# Supplementary material for: Comparison of Phenotype Nutritional Profiles and Phosphate Metabolism Genes in Four Serovars of Salmonella enterica from Water Sources
Source: MDPI journal article supplement (doi:10.3390/microorganisms11082109), 2023-08-18
Supplement: s1 [file s1]

Supplementary Figure S2. Comparisons of nine gene sequences between sequenced strains in this study. Heat maps indicating SNP differences are shown . The darker the cell the more similarity between the indicated strains. Colorations are not comparable between heat maps.

*phoB*

|                     | Enteritidis_RM18433 | Enteritidis_RM15596 | Typhimurium_RM18411 | Typhimurium_RM18387 | Give_RM20875 | Give_RM18465 | Kentucky_RM19068 | Kentucky_RM17366 |
|---------------------|---------------------|---------------------|---------------------|---------------------|--------------|--------------|------------------|------------------|
| Enteritidis_RM18433 |                     | 0                   | 0                   | 0                   | 4            | 4            | 8                | 3                |
| Enteritidis_RM15596 | 0                   |                     | 0                   | 0                   | 4            | 4            | 8                | 3                |
| Typhimurium_RM18411 | 0                   | 0                   |                     | 0                   | 4            | 4            | 8                | 3                |
| Typhimurium_RM18387 | 0                   | 0                   | 0                   |                     | 4            | 4            | 8                | 3                |
| Give_RM20875        | 4                   | 4                   | 4                   | 4                   |              | 0            | 8                | 7                |
| Give_RM18465        | 4                   | 4                   | 4                   | 4                   | 0            |              | 8                | 7                |
| Kentucky_RM19068    | 8                   | 8                   | 8                   | 8                   | 8            | 8            |                  | 11               |
| Kentucky_RM17366    | 3                   | 3                   | 3                   | 3                   | 7            | 7            | 11               |                  |

*phoR*

|                     | Enteritidis_RM18433 | Enteritidis_RM15596 | Typhimurium_RM18411 | Typhimurium_RM18387 | Give_RM20875 | Give_RM18465 | Kentucky_RM19068 | Kentucky_RM17366 |
|---------------------|---------------------|---------------------|---------------------|---------------------|--------------|--------------|------------------|------------------|
| Enteritidis_RM18433 |                     | 0                   | 3                   | 3                   | 10           | 10           | 12               | 6                |
| Enteritidis_RM15596 | 0                   |                     | 3                   | 3                   | 10           | 10           | 12               | 6                |
| Typhimurium_RM18411 | 3                   | 3                   |                     | 0                   | 11           | 11           | 13               | 7                |
| Typhimurium_RM18387 | 3                   | 3                   | 0                   |                     | 11           | 11           | 13               | 7                |
| Give_RM20875        | 10                  | 10                  | 11                  | 11                  |              | 0            | 10               | 8                |
| Give_RM18465        | 10                  | 10                  | 11                  | 11                  | 0            |              | 10               | 8                |
| Kentucky_RM19068    | 12                  | 12                  | 13                  | 13                  | 10           | 10           |                  | 10               |
| Kentucky_RM17366    | 6                   | 6                   | 7                   | 7                   | 8            | 8            | 10               |                  |

*pstA*

|                     | Enteritidis_RM18433 | Enteritidis_RM15596 | Typhimurium_RM18411 | Typhimurium_RM18387 | Give_RM20875 | Give_RM18465 | Kentucky_RM19068 | Kentucky_RM17366 |
|---------------------|---------------------|---------------------|---------------------|---------------------|--------------|--------------|------------------|------------------|
| Enteritidis_RM18433 |                     | 1                   | 7                   | 7                   | 19           | 19           | 15               | 14               |
| Enteritidis_RM15596 | 1                   |                     | 8                   | 8                   | 20           | 20           | 16               | 15               |
| Typhimurium_RM18411 | 7                   | 8                   |                     | 0                   | 24           | 24           | 8                | 17               |
| Typhimurium_RM18387 | 7                   | 8                   | 0                   |                     | 24           | 24           | 8                | 17               |
| Give_RM20875        | 19                  | 20                  | 24                  | 24                  |              | 0            | 24               | 19               |
| Give_RM18465        | 19                  | 20                  | 24                  | 24                  | 0            |              | 24               | 19               |
| Kentucky_RM19068    | 15                  | 16                  | 8                   | 8                   | 24           | 24           |                  | 19               |
| Kentucky_RM17366    | 14                  | 15                  | 17                  | 17                  | 19           | 19           | 19               |                  |

*phoU*

|                     | Enteritidis_RM18433 | Enteritidis_RM15596 | Typhimurium_RM18411 | Typhimurium_RM18387 | Give_RM20875 | Give_RM18465 | Kentucky_RM19068 | Kentucky_RM17366 |
|---------------------|---------------------|---------------------|---------------------|---------------------|--------------|--------------|------------------|------------------|
| Enteritidis_RM18433 |                     | 0                   | 18                  | 18                  | 24           | 24           | 17               | 19               |
| Enteritidis_RM15596 | 0                   |                     | 18                  | 18                  | 24           | 24           | 17               | 19               |
| Typhimurium_RM18411 | 18                  | 18                  |                     | 0                   | 20           | 20           | 9                | 9                |
| Typhimurium_RM18387 | 18                  | 18                  | 0                   |                     | 20           | 20           | 9                | 9                |
| Give_RM20875        | 24                  | 24                  | 20                  | 20                  |              | 0            | 21               | 21               |
| Give_RM18465        | 24                  | 24                  | 20                  | 20                  | 0            |              | 21               | 21               |
| Kentucky_RM19068    | 17                  | 17                  | 9                   | 9                   | 21           | 21           |                  | 10               |
| Kentucky_RM17366    | 19                  | 19                  | 9                   | 9                   | 21           | 21           | 10               |                  |

*pstB*

|                     | Enteritidis_RM18433 | Enteritidis_RM15596 | Typhimurium_RM18411 | Typhimurium_RM18387 | Give_RM20875 | Give_RM18465 | Kentucky_RM19068 | Kentucky_RM17366 |
|---------------------|---------------------|---------------------|---------------------|---------------------|--------------|--------------|------------------|------------------|
| Enteritidis_RM18433 |                     | 0                   | 3                   | 3                   | 6            | 6            | 7                | 5                |
| Enteritidis_RM15596 | 0                   |                     | 3                   | 3                   | 6            | 6            | 7                | 5                |
| Typhimurium_RM18411 | 3                   | 3                   |                     | 0                   | 5            | 5            | 6                | 4                |
| Typhimurium_RM18387 | 3                   | 3                   | 0                   |                     | 5            | 5            | 6                | 4                |
| Give_RM20875        | 6                   | 6                   | 5                   | 5                   |              | 0            | 9                | 7                |
| Give_RM18465        | 6                   | 6                   | 5                   | 5                   | 0            |              | 9                | 7                |
| Kentucky_RM19068    | 7                   | 7                   | 6                   | 6                   | 9            | 9            |                  | 8                |
| Kentucky_RM17366    | 5                   | 5                   | 4                   | 4                   | 7            | 7            | 8                |                  |

*pstC*

|                     | Enteritidis_RM18433 | Enteritidis_RM15596 | Typhimurium_RM18411 | Typhimurium_RM18387 | Give_RM20875 | Give_RM18465 | Kentucky_RM19068 | Kentucky_RM17366 |
|---------------------|---------------------|---------------------|---------------------|---------------------|--------------|--------------|------------------|------------------|
| Enteritidis_RM18433 |                     | 0                   | 0                   | 0                   | 16           | 16           | 14               | 7                |
| Enteritidis_RM15596 | 0                   |                     | 0                   | 0                   | 16           | 16           | 14               | 7                |
| Typhimurium_RM18411 | 0                   | 0                   |                     | 0                   | 16           | 16           | 14               | 7                |
| Typhimurium_RM18387 | 0                   | 0                   | 0                   |                     | 16           | 16           | 14               | 7                |
| Give_RM20875        | 16                  | 16                  | 16                  | 16                  |              | 0            | 12               | 11               |
| Give_RM18465        | 16                  | 16                  | 16                  | 16                  | 0            |              | 12               | 11               |
| Kentucky_RM19068    | 14                  | 14                  | 14                  | 14                  | 12           | 12           |                  | 9                |
| Kentucky_RM17366    | 7                   | 7                   | 7                   | 7                   | 11           | 11           | 9                |                  |

*iraP*

|                     | Enteritidis_RM18433 | Enteritidis_RM15596 | Typhimurium_RM18411 | Typhimurium_RM18387 | Give_RM20875 | Give_RM18465 | Kentucky_RM19068 | Kentucky_RM17366 |
|---------------------|---------------------|---------------------|---------------------|---------------------|--------------|--------------|------------------|------------------|
| Enteritidis_RM18433 |                     | 0                   | 0                   | 0                   | 0            | 0            | 0                | 0                |
| Enteritidis_RM15596 | 0                   |                     | 0                   | 0                   | 0            | 0            | 0                | 0                |
| Typhimurium_RM18411 | 0                   | 0                   |                     | 0                   | 0            | 0            | 0                | 0                |
| Typhimurium_RM18387 | 0                   | 0                   | 0                   |                     | 0            | 0            | 0                | 0                |
| Give_RM20875        | 0                   | 0                   | 0                   | 0                   |              | 0            | 0                | 0                |
| Give_RM18465        | 0                   | 0                   | 0                   | 0                   | 0            |              | 0                | 0                |
| Kentucky_RM19068    | 0                   | 0                   | 0                   | 0                   | 0            | 0            |                  | 0                |
| Kentucky_RM17366    | 0                   | 0                   | 0                   | 0                   | 0            | 0            | 0                |                  |

*rpoS*

|                     | Enteritidis_RM18433 | Enteritidis_RM15596 | Typhimurium_RM18411 | Typhimurium_RM18387 | Give_RM20875 | Give_RM18465 | Kentucky_RM19068 | Kentucky_RM17366 |
|---------------------|---------------------|---------------------|---------------------|---------------------|--------------|--------------|------------------|------------------|
| Enteritidis_RM18433 |                     | 0                   | 3                   | 3                   | 3            | 3            | 2                | 2                |
| Enteritidis_RM15596 | 0                   |                     | 3                   | 3                   | 3            | 3            | 2                | 2                |
| Typhimurium_RM18411 | 3                   | 3                   |                     | 0                   | 2            | 2            | 1                | 1                |
| Typhimurium_RM18387 | 3                   | 3                   | 0                   |                     | 2            | 2            | 1                | 1                |
| Give_RM20875        | 3                   | 3                   | 2                   | 2                   |              | 0            | 1                | 1                |
| Give_RM18465        | 3                   | 3                   | 2                   | 2                   | 0            |              | 1                | 1                |
| Kentucky_RM19068    | 2                   | 2                   | 1                   | 1                   | 1            | 1            |                  | 0                |
| Kentucky_RM17366    | 2                   | 2                   | 1                   | 1                   | 1            | 1            | 0                |                  |

*rrsB*

|                     | Enteritidis_RM18433 | Enteritidis_RM15596 | Typhimurium_RM18411 | Typhimurium_RM18387 | Give_RM20875 | Give_RM18465 | Kentucky_RM19068 | Kentucky_RM17366 |
|---------------------|---------------------|---------------------|---------------------|---------------------|--------------|--------------|------------------|------------------|
| Enteritidis_RM18433 |                     | 1                   | 4                   | 4                   | 4            | 4            | 6                | 8                |
| Enteritidis_RM15596 | 1                   |                     | 5                   | 5                   | 5            | 5            | 7                | 9                |
| Typhimurium_RM18411 | 4                   | 5                   |                     | 0                   | 4            | 4            | 6                | 8                |
| Typhimurium_RM18387 | 4                   | 5                   | 0                   |                     | 4            | 4            | 6                | 8                |
| Give_RM20875        | 4                   | 5                   | 4                   | 4                   |              | 0            | 6                | 6                |
| Give_RM18465        | 4                   | 5                   | 4                   | 4                   | 0            |              | 6                | 6                |
| Kentucky_RM19068    | 6                   | 7                   | 6                   | 6                   | 6            | 6            |                  | 2                |
| Kentucky_RM17366    | 8                   | 9                   | 8                   | 8                   | 6            | 6            | 2                |                  |
