# Supplementary material for: Comparison of Phenotype Nutritional Profiles and Phosphate Metabolism Genes in Four Serovars of Salmonella enterica from Water Sources
Source: MDPI journal article supplement (doi:10.3390/microorganisms11082109), 2023-08-18
Supplement: s1 [file s1]

Supplementary Figure S1. Comparisons of nine protein sequences between sequenced strains in this study. Heat maps indicating amino acid differences are shown for the proteins. The darker the cell the more similarity between the indicated strains. Colorations are not comparable between heat maps.

PhoB

|                     | Enteritidis_RM18433 | Enteritidis_RM15596 | Typhimurium_RM18411 | Typhimurium_RM18387 | Give_RM20875 | Give_RM18465 | Kentucky_RM19068 | Kentucky_RM17366 |
|---------------------|---------------------|---------------------|---------------------|---------------------|--------------|--------------|------------------|------------------|
| Enteritidis_RM18433 |                     | 0                   | 0                   | 0                   | 0            | 0            | 0                | 1                |
| Enteritidis_RM15596 | 0                   |                     | 0                   | 0                   | 0            | 0            | 0                | 1                |
| Typhimurium_RM18411 | 0                   | 0                   |                     | 0                   | 0            | 0            | 0                | 1                |
| Typhimurium_RM18387 | 0                   | 0                   | 0                   |                     | 0            | 0            | 0                | 1                |
| Give_RM20875        | 0                   | 0                   | 0                   | 0                   |              | 0            | 0                | 1                |
| Give_RM18465        | 0                   | 0                   | 0                   | 0                   | 0            |              | 0                | 1                |
| Kentucky_RM19068    | 0                   | 0                   | 0                   | 0                   | 0            | 0            |                  | 1                |
| Kentucky_RM17366    | 1                   | 1                   | 1                   | 1                   | 1            | 1            | 1                |                  |

PhoR

|                     | Enteritidis_RM18433 | Enteritidis_RM15596 | Typhimurium_RM18411 | Typhimurium_RM18387 | Give_RM20875 | Give_RM18465 | Kentucky_RM19068 | Kentucky_RM17366 |
|---------------------|---------------------|---------------------|---------------------|---------------------|--------------|--------------|------------------|------------------|
| Enteritidis_RM18433 |                     | 0                   | 1                   | 1                   | 2            | 2            | 3                | 1                |
| Enteritidis_RM15596 | 0                   |                     | 1                   | 1                   | 2            | 2            | 3                | 1                |
| Typhimurium_RM18411 | 1                   | 1                   |                     | 0                   | 1            | 1            | 2                | 0                |
| Typhimurium_RM18387 | 1                   | 1                   | 0                   |                     | 1            | 1            | 2                | 0                |
| Give_RM20875        | 2                   | 2                   | 1                   | 1                   |              | 0            | 1                | 1                |
| Give_RM18465        | 2                   | 2                   | 1                   | 1                   | 0            |              | 1                | 1                |
| Kentucky_RM19068    | 3                   | 3                   | 2                   | 2                   | 1            | 1            |                  | 2                |
| Kentucky_RM17366    | 1                   | 1                   | 0                   | 0                   | 1            | 1            | 2                |                  |

PstA

|                     | Enteritidis_RM18433 | Enteritidis_RM15596 | Typhimurium_RM18411 | Typhimurium_RM18387 | Give_RM20875 | Give_RM18465 | Kentucky_RM19068 | Kentucky_RM17366 |
|---------------------|---------------------|---------------------|---------------------|---------------------|--------------|--------------|------------------|------------------|
| Enteritidis_RM18433 |                     | 0                   | 0                   | 0                   | 1            | 1            | 0                | 0                |
| Enteritidis_RM15596 | 0                   |                     | 0                   | 0                   | 1            | 1            | 0                | 0                |
| Typhimurium_RM18411 | 0                   | 0                   |                     | 0                   | 1            | 1            | 0                | 0                |
| Typhimurium_RM18387 | 0                   | 0                   | 0                   |                     | 1            | 1            | 0                | 0                |
| Give_RM20875        | 1                   | 1                   | 1                   | 1                   |              | 0            | 1                | 1                |
| Give_RM18465        | 1                   | 1                   | 1                   | 1                   | 0            |              | 1                | 1                |
| Kentucky_RM19068    | 0                   | 0                   | 0                   | 0                   | 1            | 1            |                  | 0                |
| Kentucky_RM17366    | 0                   | 0                   | 0                   | 0                   | 1            | 1            | 0                |                  |

PhoU

|                     | Enteritidis_RM18433 | Enteritidis_RM15596 | Typhimurium_RM18411 | Typhimurium_RM18387 | Give_RM20875 | Give_RM18465 | Kentucky_RM19068 | Kentucky_RM17366 |
|---------------------|---------------------|---------------------|---------------------|---------------------|--------------|--------------|------------------|------------------|
| Enteritidis_RM18433 |                     | 0                   | 0                   | 0                   | 0            | 0            | 0                | 0                |
| Enteritidis_RM15596 | 0                   |                     | 0                   | 0                   | 0            | 0            | 0                | 0                |
| Typhimurium_RM18411 | 0                   | 0                   |                     | 0                   | 0            | 0            | 0                | 0                |
| Typhimurium_RM18387 | 0                   | 0                   | 0                   |                     | 0            | 0            | 0                | 0                |
| Give_RM20875        | 0                   | 0                   | 0                   | 0                   |              | 0            | 0                | 0                |
| Give_RM18465        | 0                   | 0                   | 0                   | 0                   | 0            |              | 0                | 0                |
| Kentucky_RM19068    | 0                   | 0                   | 0                   | 0                   | 0            | 0            |                  | 0                |
| Kentucky_RM17366    | 0                   | 0                   | 0                   | 0                   | 0            | 0            | 0                |                  |

PstB

|                     | Enteritidis_RM18433 | Enteritidis_RM15596 | Typhimurium_RM18411 | Typhimurium_RM18387 | Give_RM20875 | Give_RM18465 | Kentucky_RM19068 | Kentucky_RM17366 |
|---------------------|---------------------|---------------------|---------------------|---------------------|--------------|--------------|------------------|------------------|
| Enteritidis_RM18433 |                     | 0                   | 0                   | 0                   | 0            | 0            | 0                | 0                |
| Enteritidis_RM15596 | 0                   |                     | 0                   | 0                   | 0            | 0            | 0                | 0                |
| Typhimurium_RM18411 | 0                   | 0                   |                     | 0                   | 0            | 0            | 0                | 0                |
| Typhimurium_RM18387 | 0                   | 0                   | 0                   |                     | 0            | 0            | 0                | 0                |
| Give_RM20875        | 0                   | 0                   | 0                   | 0                   |              | 0            | 0                | 0                |
| Give_RM18465        | 0                   | 0                   | 0                   | 0                   | 0            |              | 0                | 0                |
| Kentucky_RM19068    | 0                   | 0                   | 0                   | 0                   | 0            | 0            |                  | 0                |
| Kentucky_RM17366    | 0                   | 0                   | 0                   | 0                   | 0            | 0            | 0                |                  |

PstC

|                     | Enteritidis_RM18433 | Enteritidis_RM15596 | Typhimurium_RM18411 | Typhimurium_RM18387 | Give_RM20875 | Give_RM18465 | Kentucky_RM19068 | Kentucky_RM17366 |
|---------------------|---------------------|---------------------|---------------------|---------------------|--------------|--------------|------------------|------------------|
| Enteritidis_RM18433 |                     | 0                   | 0                   | 0                   | 0            | 0            | 0                | 0                |
| Enteritidis_RM15596 | 0                   |                     | 0                   | 0                   | 0            | 0            | 0                | 0                |
| Typhimurium_RM18411 | 0                   | 0                   |                     | 0                   | 0            | 0            | 0                | 0                |
| Typhimurium_RM18387 | 0                   | 0                   | 0                   |                     | 0            | 0            | 0                | 0                |
| Give_RM20875        | 0                   | 0                   | 0                   | 0                   |              | 0            | 0                | 0                |
| Give_RM18465        | 0                   | 0                   | 0                   | 0                   | 0            |              | 0                | 0                |
| Kentucky_RM19068    | 0                   | 0                   | 0                   | 0                   | 0            | 0            |                  | 0                |
| Kentucky_RM17366    | 0                   | 0                   | 0                   | 0                   | 0            | 0            | 0                |                  |

## IraP

|                     | Enteritidis_RM18433 | Enteritidis_RM15596 | Typhimurium_RM18411 | Typhimurium_RM18387 | Give_RM20875 | Give_RM18465 | Kentucky_RM19068 | Kentucky_RM17366 |
|---------------------|---------------------|---------------------|---------------------|---------------------|--------------|--------------|------------------|------------------|
| Enteritidis_RM18433 |                     | 0                   | 0                   | 0                   | 0            | 0            | 0                | 0                |
| Enteritidis_RM15596 | 0                   |                     | 0                   | 0                   | 0            | 0            | 0                | 0                |
| Typhimurium_RM18411 | 0                   | 0                   |                     | 0                   | 0            | 0            | 0                | 0                |
| Typhimurium_RM18387 | 0                   | 0                   | 0                   |                     | 0            | 0            | 0                | 0                |
| Give_RM20875        | 0                   | 0                   | 0                   | 0                   |              | 0            | 0                | 0                |
| Give_RM18465        | 0                   | 0                   | 0                   | 0                   | 0            |              | 0                | 0                |
| Kentucky_RM19068    | 0                   | 0                   | 0                   | 0                   | 0            | 0            |                  | 0                |
| Kentucky_RM17366    | 0                   | 0                   | 0                   | 0                   | 0            | 0            | 0                |                  |

## RpoS

|                     | Enteritidis_RM18433 | Enteritidis_RM15596 | Typhimurium_RM18411 | Typhimurium_RM18387 | Give_RM20875 | Give_RM18465 | Kentucky_RM19068 | Kentucky_RM17366 |
|---------------------|---------------------|---------------------|---------------------|---------------------|--------------|--------------|------------------|------------------|
| Enteritidis_RM18433 |                     | 0                   | 0                   | 0                   | 0            | 0            | 0                | 0                |
| Enteritidis_RM15596 | 0                   |                     | 0                   | 0                   | 0            | 0            | 0                | 0                |
| Typhimurium_RM18411 | 0                   | 0                   |                     | 0                   | 0            | 0            | 0                | 0                |
| Typhimurium_RM18387 | 0                   | 0                   | 0                   |                     | 0            | 0            | 0                | 0                |
| Give_RM20875        | 0                   | 0                   | 0                   | 0                   |              | 0            | 0                | 0                |
| Give_RM18465        | 0                   | 0                   | 0                   | 0                   | 0            |              | 0                | 0                |
| Kentucky_RM19068    | 0                   | 0                   | 0                   | 0                   | 0            | 0            |                  | 0                |
| Kentucky_RM17366    | 0                   | 0                   | 0                   | 0                   | 0            | 0            | 0                |                  |

## RrsB

|                     | Enteritidis_RM18433 | Enteritidis_RM15596 | Typhimurium_RM18411 | Typhimurium_RM18387 | Give_RM20875 | Give_RM18465 | Kentucky_RM19068 | Kentucky_RM17366 |
|---------------------|---------------------|---------------------|---------------------|---------------------|--------------|--------------|------------------|------------------|
| Enteritidis_RM18433 |                     | 0                   | 0                   | 0                   | 0            | 0            | 0                | 0                |
| Enteritidis_RM15596 | 0                   |                     | 0                   | 0                   | 0            | 0            | 0                | 0                |
| Typhimurium_RM18411 | 0                   | 0                   |                     | 0                   | 0            | 0            | 0                | 0                |
| Typhimurium_RM18387 | 0                   | 0                   | 0                   |                     | 0            | 0            | 0                | 0                |
| Give_RM20875        | 0                   | 0                   | 0                   | 0                   |              | 0            | 0                | 0                |
| Give_RM18465        | 0                   | 0                   | 0                   | 0                   | 0            |              | 0                | 0                |
| Kentucky_RM19068    | 0                   | 0                   | 0                   | 0                   | 0            | 0            |                  | 0                |
| Kentucky_RM17366    | 0                   | 0                   | 0                   | 0                   | 0            | 0            | 0                |                  |
